# Supplementary material for: Identification of Novel Pathways in Plant Lectin-Induced Cancer Cell Apoptosis
Source: PubMed Central journal article supplement (PMC4783960; doi:10.3390/ijms17020228), 2016-02-08
Supplement: ijms-17-00228-s001.pdf [file ijms-17-00228-s001.pdf]

# Supplementary Materials: Identification of Novel Pathways in Plant Lectin-Induced Cancer Cell Apoptosis

Zheng Shi, Rong Sun, Tian Yu, Rong Liu, Li-Jia Cheng, Jin-Ku Bao, Liang Zou and Yong Tang

**Table S1.** The predicted core apoptotic protein-protein interaction (PPI) network.

| Protein 1   | Protein 2   |
|-------------|-------------|
| ABL1_HUMAN  | 1433B_HUMAN |
| M3K5_HUMAN  | 1433B_HUMAN |
| MYC_HUMAN   | 1433B_HUMAN |
| RAF1_HUMAN  | 1433B_HUMAN |
| ABL1_HUMAN  | 1433E_HUMAN |
| CASP3_HUMAN | 1433E_HUMAN |
| EGFR_HUMAN  | 1433E_HUMAN |
| MYC_HUMAN   | 1433E_HUMAN |
| BAD_HUMAN   | 1433F_HUMAN |
| M3K5_HUMAN  | 1433F_HUMAN |
| BAD_HUMAN   | 1433G_HUMAN |
| ABL1_HUMAN  | 1433T_HUMAN |
| BAD_HUMAN   | 1433T_HUMAN |
| BAX_HUMAN   | 1433T_HUMAN |
| EGFR_HUMAN  | 1433T_HUMAN |
| M3K5_HUMAN  | 1433T_HUMAN |
| MYC_HUMAN   | 1433T_HUMAN |
| A4_HUMAN    | 1433Z_HUMAN |
| AKT1_HUMAN  | 1433Z_HUMAN |
| ARRB1_HUMAN | 1433Z_HUMAN |
| CBL_HUMAN   | 1433Z_HUMAN |
| EGFR_HUMAN  | 1433Z_HUMAN |
| M3K5_HUMAN  | 1433Z_HUMAN |
| MK08_HUMAN  | 1433Z_HUMAN |
| MP2K1_HUMAN | 1433Z_HUMAN |
| NEMO_HUMAN  | 1433Z_HUMAN |
| NR4A1_HUMAN | 1433Z_HUMAN |
| CUL1_HUMAN  | 2AAA_HUMAN  |
| NFKB2_HUMAN | 2AAA_HUMAN  |
| PP2AA_HUMAN | 2AAA_HUMAN  |
| P53_HUMAN   | 2ABB_HUMAN  |
| SMAD2_HUMAN | 2ABB_HUMAN  |
| SMAD3_HUMAN | 2ABB_HUMAN  |
| SMUF1_HUMAN | 2ABB_HUMAN  |
| VHL_HUMAN   | 2ABB_HUMAN  |
| CASP4_HUMAN | A4_HUMAN    |
| CASP6_HUMAN | A4_HUMAN    |
| G3P_HUMAN   | A4_HUMAN    |
| ATM_HUMAN   | ABL1_HUMAN  |
| CRK_HUMAN   | ABL1_HUMAN  |
| 2ABB_HUMAN  | ACTB_HUMAN  |
| A4_HUMAN    | ACTB_HUMAN  |
| SMAD3_HUMAN | ACTB_HUMAN  |
| 1433Z_HUMAN | ACTG_HUMAN  |
| IKBA_HUMAN  | ACTG_HUMAN  |
| IKKB_HUMAN  | ACTG_HUMAN  |
| IKKE_HUMAN  | ACTG_HUMAN  |

Table S1.Cont.

| Protein 1   | Protein 2   |
|-------------|-------------|
| M3K1_HUMAN  | ACTG_HUMAN  |
| MCL1_HUMAN  | ACTG_HUMAN  |
| MYC_HUMAN   | ACTG_HUMAN  |
| NEMO_HUMAN  | ACTG_HUMAN  |
| NFKB1_HUMAN | ACTG_HUMAN  |
| RIPK2_HUMAN | ACTG_HUMAN  |
| SMAD3_HUMAN | ACTG_HUMAN  |
| TF65_HUMAN  | ACTG_HUMAN  |
| TNR1A_HUMAN | ACTG_HUMAN  |
| TNR1B_HUMAN | ACTG_HUMAN  |
| TRADD_HUMAN | ACTG_HUMAN  |
| TRAF1_HUMAN | ACTG_HUMAN  |
| TRAF2_HUMAN | ACTG_HUMAN  |
| TRAF6_HUMAN | ACTG_HUMAN  |
| MDM2_HUMAN  | AKT1_HUMAN  |
| NARG2_HUMAN | AKT1_HUMAN  |
| TAU_HUMAN   | AKT1_HUMAN  |
| BRCA1_HUMAN | ANDR_HUMAN  |
| CDK1_HUMAN  | ANDR_HUMAN  |
| CEBPB_HUMAN | ANDR_HUMAN  |
| GSK3B_HUMAN | ANDR_HUMAN  |
| HSP71_HUMAN | ANDR_HUMAN  |
| MK01_HUMAN  | ANDR_HUMAN  |
| MK01_HUMAN  | ARRB1_HUMAN |
| MK01_HUMAN  | ARRB2_HUMAN |
| RAF1_HUMAN  | ARRB2_HUMAN |
| KAT5_HUMAN  | ATM_HUMAN   |
| NEMO_HUMAN  | ATM_HUMAN   |
| NEMO_HUMAN  | ATR_HUMAN   |
| ABL1_HUMAN  | B2CL1_HUMAN |
| BAK_HUMAN   | B2CL1_HUMAN |
| BAX_HUMAN   | B2CL1_HUMAN |
| BCL2_HUMAN  | B2CL1_HUMAN |
| MK08_HUMAN  | B2CL1_HUMAN |
| 1433Z_HUMAN | BAD_HUMAN   |
| B2CL1_HUMAN | BAD_HUMAN   |
| KAPCA_HUMAN | BAD_HUMAN   |
| MCL1_HUMAN  | BAD_HUMAN   |
| PKN1_HUMAN  | BAD_HUMAN   |
| PP1A_HUMAN  | BAD_HUMAN   |
| RAF1_HUMAN  | BAD_HUMAN   |
| B2CL1_HUMAN | BAK_HUMAN   |
| MCL1_HUMAN  | BAK_HUMAN   |
| B2CL1_HUMAN | BAX_HUMAN   |
| ORN_HUMAN   | BAX_HUMAN   |
| PP1A_HUMAN  | BAX_HUMAN   |
| BAK_HUMAN   | BCL10_HUMAN |
| BAX_HUMAN   | BCL10_HUMAN |
| CASP1_HUMAN | BCL10_HUMAN |
| CASP2_HUMAN | BCL10_HUMAN |
| CASP8_HUMAN | BCL10_HUMAN |
| CDK2_HUMAN  | BCL10_HUMAN |
| CFLAR_HUMAN | BCL10_HUMAN |
| NEMO_HUMAN  | BCL10_HUMAN |
| NOD1_HUMAN  | BCL10_HUMAN |
| B2CL1_HUMAN | BCL2_HUMAN  |

Table S1.Cont.

| Protein 1   | Protein 2   |
|-------------|-------------|
| BAX_HUMAN   | BCL2_HUMAN  |
| MCL1_HUMAN  | BCL2_HUMAN  |
| P53_HUMAN   | BCL2_HUMAN  |
| RASH_HUMAN  | BCL2_HUMAN  |
| NCOR1_HUMAN | BCL6_HUMAN  |
| ATR_HUMAN   | BID_HUMAN   |
| CASP1_HUMAN | BID_HUMAN   |
| CASP2_HUMAN | BID_HUMAN   |
| CASP3_HUMAN | BID_HUMAN   |
| CSK21_HUMAN | BID_HUMAN   |
| EZRI_HUMAN  | BID_HUMAN   |
| NEMO_HUMAN  | BIRC2_HUMAN |
| RIP_HUMAN   | BIRC2_HUMAN |
| UBB_HUMAN   | BIRC2_HUMAN |
| TF65_HUMAN  | BTK_HUMAN   |
| TNFR1_HUMAN | BTK_HUMAN   |
| 1433Z_HUMAN | CALM_HUMAN  |
| 2ABB_HUMAN  | CALM_HUMAN  |
| IKBA_HUMAN  | CALM_HUMAN  |
| M3K7_HUMAN  | CALM_HUMAN  |
| NEMO_HUMAN  | CALM_HUMAN  |
| TF65_HUMAN  | CALM_HUMAN  |
| TNR1A_HUMAN | CALM_HUMAN  |
| TNR1B_HUMAN | CALM_HUMAN  |
| TNR6_HUMAN  | CALM_HUMAN  |
| TRADD_HUMAN | CALM_HUMAN  |
| TRAF2_HUMAN | CALM_HUMAN  |
| TRAF6_HUMAN | CALM_HUMAN  |
| VHL_HUMAN   | CALM_HUMAN  |
| ANDR_HUMAN  | CASP1_HUMAN |
| CASP2_HUMAN | CASP1_HUMAN |
| CASP9_HUMAN | CASP1_HUMAN |
| CFLAR_HUMAN | CASP1_HUMAN |
| ANDR_HUMAN  | CASP3_HUMAN |
| SLK_HUMAN   | CASP3_HUMAN |
| BCL10_HUMAN | CASP4_HUMAN |
| CFLAR_HUMAN | CASP4_HUMAN |
| RIPK2_HUMAN | CASP4_HUMAN |
| ANDR_HUMAN  | CASP7_HUMAN |
| GRP78_HUMAN | CASP7_HUMAN |
| IKKE_HUMAN  | CASP7_HUMAN |
| LYN_HUMAN   | CASP7_HUMAN |
| ANDR_HUMAN  | CASP8_HUMAN |
| EZRI_HUMAN  | CASP8_HUMAN |
| IKKA_HUMAN  | CASP8_HUMAN |
| IKKB_HUMAN  | CASP8_HUMAN |
| NEMO_HUMAN  | CASP8_HUMAN |
| ABL1_HUMAN  | CASP9_HUMAN |
| CASP3_HUMAN | CASP9_HUMAN |
| CFLAR_HUMAN | CASP9_HUMAN |
| LYN_HUMAN   | CASP9_HUMAN |
| XIAP_HUMAN  | CASP9_HUMAN |
| BID_HUMAN   | CASPA_HUMAN |
| EZRI_HUMAN  | CASPA_HUMAN |
| MK08_HUMAN  | CASPA_HUMAN |

Table S1.Cont.

| Protein 1   | Protein 2   |
|-------------|-------------|
| RHOA_HUMAN  | CASPA_HUMAN |
| TNR1B_HUMAN | CAV1_HUMAN  |
| CEBPB_HUMAN | CBP_HUMAN   |
| CDK1_HUMAN  | CCNB1_HUMAN |
| CUL1_HUMAN  | CCNB1_HUMAN |
| MDM2_HUMAN  | CD2A2_HUMAN |
| P53_HUMAN   | CD2A2_HUMAN |
| 2ABB_HUMAN  | CDC42_HUMAN |
| CASP7_HUMAN | CDC42_HUMAN |
| ATR_HUMAN   | CDK1_HUMAN  |
| CCNB1_HUMAN | CDK1_HUMAN  |
| KAT5_HUMAN  | CDK1_HUMAN  |
| NARG2_HUMAN | CDK1_HUMAN  |
| ORN_HUMAN   | CDK1_HUMAN  |
| PCNA_HUMAN  | CDK1_HUMAN  |
| PIN1_HUMAN  | CDK1_HUMAN  |
| UBC_HUMAN   | CDK1_HUMAN  |
| ZBT16_HUMAN | CDK1_HUMAN  |
| CDN1A_HUMAN | CDK2_HUMAN  |
| MK01_HUMAN  | CDK2_HUMAN  |
| VHL_HUMAN   | CDK2_HUMAN  |
| HDAC4_HUMAN | CDK5_HUMAN  |
| NARG2_HUMAN | CDK5_HUMAN  |
| P53_HUMAN   | CDK5_HUMAN  |
| CASP3_HUMAN | CDN1A_HUMAN |
| CBP_HUMAN   | CDN1A_HUMAN |
| CDK2_HUMAN  | CDN1A_HUMAN |
| ESR1_HUMAN  | CDN1A_HUMAN |
| MK01_HUMAN  | CDN1A_HUMAN |
| PCNA_HUMAN  | CDN1A_HUMAN |
| STAT3_HUMAN | CDN1A_HUMAN |
| 1433E_HUMAN | CEBPB_HUMAN |
| EGFR_HUMAN  | CEBPB_HUMAN |
| MK01_HUMAN  | CEBPB_HUMAN |
| P53_HUMAN   | CEBPB_HUMAN |
| SP1_HUMAN   | CEBPB_HUMAN |
| STA5A_HUMAN | CEBPB_HUMAN |
| TGFR2_HUMAN | CEBPB_HUMAN |
| DAXX_HUMAN  | CFLAR_HUMAN |
| FADD_HUMAN  | CFLAR_HUMAN |
| TRAF2_HUMAN | CFLAR_HUMAN |
| UBC_HUMAN   | CFLAR_HUMAN |
| KPCA_HUMAN  | CFTR_HUMAN  |
| 1433Z_HUMAN | CH60_HUMAN  |
| 2ABB_HUMAN  | CH60_HUMAN  |
| ACTB_HUMAN  | CH60_HUMAN  |
| CASP9_HUMAN | CH60_HUMAN  |
| CFTR_HUMAN  | CH60_HUMAN  |
| HSP71_HUMAN | CH60_HUMAN  |
| KAPCA_HUMAN | CH60_HUMAN  |
| PIN1_HUMAN  | CH60_HUMAN  |
| VHL_HUMAN   | CRCM_HUMAN  |
| TNFL6_HUMAN | CRK_HUMAN   |
| HDAC3_HUMAN | CSK21_HUMAN |
| JUN_HUMAN   | CSK21_HUMAN |

Table S1.Cont.

| Protein 1   | Protein 2   |
|-------------|-------------|
| PML_HUMAN   | CSK21_HUMAN |
| MK01_HUMAN  | CSN5_HUMAN  |
| VHL_HUMAN   | CSN5_HUMAN  |
| ABL1_HUMAN  | CTNB1_HUMAN |
| CASP8_HUMAN | CTNB1_HUMAN |
| CSK21_HUMAN | CTNB1_HUMAN |
| FYN_HUMAN   | CTNB1_HUMAN |
| MUC1_HUMAN  | CTNB1_HUMAN |
| PIN1_HUMAN  | CTNB1_HUMAN |
| SLK_HUMAN   | CTNB1_HUMAN |
| CRCM_HUMAN  | CUL1_HUMAN  |
| CSN5_HUMAN  | CUL1_HUMAN  |
| IKKA_HUMAN  | CUL1_HUMAN  |
| PP1A_HUMAN  | CUL1_HUMAN  |
| UBC_HUMAN   | CUL1_HUMAN  |
| ANDR_HUMAN  | DAXX_HUMAN  |
| TNR6_HUMAN  | DAXX_HUMAN  |
| 1433Z_HUMAN | EF1A1_HUMAN |
| 2ABB_HUMAN  | EF1A1_HUMAN |
| EGFR_HUMAN  | EF1A1_HUMAN |
| NR4A1_HUMAN | EF1A1_HUMAN |
| TNR6_HUMAN  | EF1A1_HUMAN |
| CASP1_HUMAN | EGFR_HUMAN  |
| GRB2_HUMAN  | EGFR_HUMAN  |
| MUC1_HUMAN  | EGFR_HUMAN  |
| AKT1_HUMAN  | EP300_HUMAN |
| CDK2_HUMAN  | EP300_HUMAN |
| CEBPB_HUMAN | EP300_HUMAN |
| ESR1_HUMAN  | EP300_HUMAN |
| HIF1A_HUMAN | EP300_HUMAN |
| KPCD_HUMAN  | EP300_HUMAN |
| MP2K1_HUMAN | EP300_HUMAN |
| MUC1_HUMAN  | EP300_HUMAN |
| PAG1_HUMAN  | EP300_HUMAN |
| ESR1_HUMAN  | ERBB2_HUMAN |
| MUC1_HUMAN  | ERBB2_HUMAN |
| UBB_HUMAN   | ERBB2_HUMAN |
| MUC1_HUMAN  | ERBB3_HUMAN |
| CEBPB_HUMAN | ESR1_HUMAN  |
| GRB2_HUMAN  | ESR1_HUMAN  |
| IKKA_HUMAN  | ESR1_HUMAN  |
| KAT5_HUMAN  | ESR1_HUMAN  |
| M3K1_HUMAN  | ESR1_HUMAN  |
| MK14_HUMAN  | ESR1_HUMAN  |
| NARG2_HUMAN | ESR1_HUMAN  |
| PKN1_HUMAN  | ESR1_HUMAN  |
| PTN6_HUMAN  | ESR1_HUMAN  |
| SHC1_HUMAN  | ESR1_HUMAN  |
| SRC_HUMAN   | ESR1_HUMAN  |
| BAD_HUMAN   | EWS_HUMAN   |
| 1433Z_HUMAN | EZRI_HUMAN  |
| CDK5_HUMAN  | EZRI_HUMAN  |
| IKKE_HUMAN  | EZRI_HUMAN  |
| RIPK2_HUMAN | EZRI_HUMAN  |
| TNR6_HUMAN  | EZRI_HUMAN  |

Table S1.Cont.

| Protein 1   | Protein 2   |
|-------------|-------------|
| VHL_HUMAN   | EZRI_HUMAN  |
| CFLAR_HUMAN | FADD_HUMAN  |
| EZRI_HUMAN  | FADD_HUMAN  |
| RIP_HUMAN   | FADD_HUMAN  |
| TNR1A_HUMAN | FADD_HUMAN  |
| TNR6_HUMAN  | FADD_HUMAN  |
| TRADD_HUMAN | FADD_HUMAN  |
| TNR1A_HUMAN | FAK1_HUMAN  |
| ESR1_HUMAN  | FHL2_HUMAN  |
| PSN2_HUMAN  | FHL2_HUMAN  |
| TNFL6_HUMAN | FINC_HUMAN  |
| VHL_HUMAN   | FINC_HUMAN  |
| 1433Z_HUMAN | FLNA_HUMAN  |
| NEMO_HUMAN  | FLNA_HUMAN  |
| PSN1_HUMAN  | FLNA_HUMAN  |
| RAC1_HUMAN  | FLNA_HUMAN  |
| TNR1B_HUMAN | FLNA_HUMAN  |
| TRAF2_HUMAN | FLNA_HUMAN  |
| HSP71_HUMAN | FOS_HUMAN   |
| JUN_HUMAN   | FOS_HUMAN   |
| CASP3_HUMAN | FYN_HUMAN   |
| 1433Z_HUMAN | G3P_HUMAN   |
| EGFR_HUMAN  | G3P_HUMAN   |
| MCL1_HUMAN  | G3P_HUMAN   |
| RIPK2_HUMAN | G3P_HUMAN   |
| TNR1B_HUMAN | G3P_HUMAN   |
| TRAF1_HUMAN | G3P_HUMAN   |
| HSP71_HUMAN | GCR_HUMAN   |
| MK01_HUMAN  | GCR_HUMAN   |
| MK08_HUMAN  | GCR_HUMAN   |
| P53_HUMAN   | GCR_HUMAN   |
| PRKDC_HUMAN | GCR_HUMAN   |
| SMAD3_HUMAN | GCR_HUMAN   |
| STA5A_HUMAN | GCR_HUMAN   |
| STA5B_HUMAN | GCR_HUMAN   |
| ZBT16_HUMAN | GCR_HUMAN   |
| A4_HUMAN    | GRB2_HUMAN  |
| BAD_HUMAN   | GRB2_HUMAN  |
| RAF1_HUMAN  | GRB2_HUMAN  |
| SMAD3_HUMAN | GRB2_HUMAN  |
| TNR16_HUMAN | GRB2_HUMAN  |
| 1433G_HUMAN | GRP75_HUMAN |
| 2ABB_HUMAN  | GRP75_HUMAN |
| ARRB1_HUMAN | GRP75_HUMAN |
| CFTR_HUMAN  | GRP75_HUMAN |
| EGFR_HUMAN  | GRP75_HUMAN |
| GRP78_HUMAN | GRP75_HUMAN |
| H2AX_HUMAN  | GRP75_HUMAN |
| HS90B_HUMAN | GRP75_HUMAN |
| IKKE_HUMAN  | GRP75_HUMAN |
| M3K1_HUMAN  | GRP75_HUMAN |
| M3K14_HUMAN | GRP75_HUMAN |
| M3K3_HUMAN  | GRP75_HUMAN |
| M3K7_HUMAN  | GRP75_HUMAN |
| NEMO_HUMAN  | GRP75_HUMAN |

Table S1.Cont.

| Protein 1   | Protein 2   |
|-------------|-------------|
| NFKB2_HUMAN | GRP75_HUMAN |
| RIPK1_HUMAN | GRP75_HUMAN |
| TNR1A_HUMAN | GRP75_HUMAN |
| TNR1B_HUMAN | GRP75_HUMAN |
| TRAF1_HUMAN | GRP75_HUMAN |
| TRAF2_HUMAN | GRP75_HUMAN |
| 2ABB_HUMAN  | GRP78_HUMAN |
| M3K1_HUMAN  | GRP78_HUMAN |
| M3K14_HUMAN | GRP78_HUMAN |
| M3K3_HUMAN  | GRP78_HUMAN |
| NEMO_HUMAN  | GRP78_HUMAN |
| NFKB2_HUMAN | GRP78_HUMAN |
| RAF1_HUMAN  | GRP78_HUMAN |
| RUVB2_HUMAN | GRP78_HUMAN |
| TNR1B_HUMAN | GRP78_HUMAN |
| AKT1_HUMAN  | GSK3B_HUMAN |
| MYC_HUMAN   | GSK3B_HUMAN |
| NEMO_HUMAN  | GSK3B_HUMAN |
| PTN1_HUMAN  | GSK3B_HUMAN |
| ATM_HUMAN   | H2AX_HUMAN  |
| BRCA1_HUMAN | H4_HUMAN    |
| HDAC1_HUMAN | H4_HUMAN    |
| M3K1_HUMAN  | H4_HUMAN    |
| M3K7_HUMAN  | H4_HUMAN    |
| TNR1A_HUMAN | H4_HUMAN    |
| BAD_HUMAN   | HCLS1_HUMAN |
| CASP3_HUMAN | HCLS1_HUMAN |
| CDN1A_HUMAN | HDAC1_HUMAN |
| CSK21_HUMAN | HDAC1_HUMAN |
| ESR1_HUMAN  | HDAC1_HUMAN |
| GCR_HUMAN   | HDAC1_HUMAN |
| NARG2_HUMAN | HDAC1_HUMAN |
| UBC9_HUMAN  | HDAC1_HUMAN |
| HDAC3_HUMAN | HDAC2_HUMAN |
| IKKE_HUMAN  | HDAC2_HUMAN |
| ANDR_HUMAN  | HDAC3_HUMAN |
| UBC_HUMAN   | HDAC3_HUMAN |
| 1433Z_HUMAN | HDAC4_HUMAN |
| EP300_HUMAN | HIF1A_HUMAN |
| VHL_HUMAN   | HIF1A_HUMAN |
| 1433Z_HUMAN | HS71L_HUMAN |
| HSP71_HUMAN | HS71L_HUMAN |
| IKBA_HUMAN  | HS71L_HUMAN |
| IKKB_HUMAN  | HS71L_HUMAN |
| M3K1_HUMAN  | HS71L_HUMAN |
| M3K7_HUMAN  | HS71L_HUMAN |
| NEMO_HUMAN  | HS71L_HUMAN |
| NFKB1_HUMAN | HS71L_HUMAN |
| P53_HUMAN   | HS71L_HUMAN |
| RIPK1_HUMAN | HS71L_HUMAN |
| RIPK2_HUMAN | HS71L_HUMAN |
| TF65_HUMAN  | HS71L_HUMAN |
| TNR1A_HUMAN | HS71L_HUMAN |
| TNR1B_HUMAN | HS71L_HUMAN |
| TRADD_HUMAN | HS71L_HUMAN |

Table S1.Cont.

| Protein 1   | Protein 2   |
|-------------|-------------|
| TRAF1_HUMAN | HS71L_HUMAN |
| TRAF2_HUMAN | HS71L_HUMAN |
| TRAF6_HUMAN | HS71L_HUMAN |
| 1433Z_HUMAN | HS90A_HUMAN |
| CH60_HUMAN  | HS90A_HUMAN |
| CUL1_HUMAN  | HS90A_HUMAN |
| M3K7_HUMAN  | HS90A_HUMAN |
| NOD1_HUMAN  | HS90A_HUMAN |
| RAF1_HUMAN  | HS90A_HUMAN |
| RIPK1_HUMAN | HS90A_HUMAN |
| TNR1A_HUMAN | HS90A_HUMAN |
| TRADD_HUMAN | HS90A_HUMAN |
| 1433Z_HUMAN | HS90B_HUMAN |
| CUL1_HUMAN  | HS90B_HUMAN |
| NEMO_HUMAN  | HS90B_HUMAN |
| RAF1_HUMAN  | HS90B_HUMAN |
| RIPK1_HUMAN | HS90B_HUMAN |
| TF65_HUMAN  | HS90B_HUMAN |
| TRADD_HUMAN | HS90B_HUMAN |
| 1433G_HUMAN | HSP71_HUMAN |
| 1433T_HUMAN | HSP71_HUMAN |
| 2ABB_HUMAN  | HSP71_HUMAN |
| CFTR_HUMAN  | HSP71_HUMAN |
| CSN5_HUMAN  | HSP71_HUMAN |
| GRP75_HUMAN | HSP71_HUMAN |
| GRP78_HUMAN | HSP71_HUMAN |
| H2AX_HUMAN  | HSP71_HUMAN |
| KPCA_HUMAN  | HSP71_HUMAN |
| NEMO_HUMAN  | HSP71_HUMAN |
| NOD1_HUMAN  | HSP71_HUMAN |
| 1433Z_HUMAN | HSP74_HUMAN |
| GRP78_HUMAN | HSP74_HUMAN |
| HDAC1_HUMAN | HSP74_HUMAN |
| HDAC3_HUMAN | HSP74_HUMAN |
| IKBA_HUMAN  | HSP74_HUMAN |
| RAF1_HUMAN  | HSP74_HUMAN |
| 1433Z_HUMAN | HSP7C_HUMAN |
| 2ABB_HUMAN  | HSP7C_HUMAN |
| A4_HUMAN    | HSP7C_HUMAN |
| EGFR_HUMAN  | HSP7C_HUMAN |
| HDAC3_HUMAN | HSP7C_HUMAN |
| IKKB_HUMAN  | HSP7C_HUMAN |
| JAK2_HUMAN  | HSP7C_HUMAN |
| M3K1_HUMAN  | HSP7C_HUMAN |
| M3K7_HUMAN  | HSP7C_HUMAN |
| NFKB1_HUMAN | HSP7C_HUMAN |
| RAF1_HUMAN  | HSP7C_HUMAN |
| RIPK1_HUMAN | HSP7C_HUMAN |
| RIPK2_HUMAN | HSP7C_HUMAN |
| TNR1B_HUMAN | HSP7C_HUMAN |
| TRADD_HUMAN | HSP7C_HUMAN |
| TRAF1_HUMAN | HSP7C_HUMAN |
| TRAF2_HUMAN | HSP7C_HUMAN |
| TRAF6_HUMAN | HSP7C_HUMAN |
| CFTR_HUMAN  | HSPB1_HUMAN |
| EGFR_HUMAN  | HSPB1_HUMAN |



Table S1.Cont.

| Protein 1   | Protein 2   |
|-------------|-------------|
| GRB2_HUMAN  | HSPB1_HUMAN |
| TRAF2_HUMAN | HSPB1_HUMAN |
| CUL1_HUMAN  | IKBA_HUMAN  |
| IKKA_HUMAN  | IKBA_HUMAN  |
| NCOR2_HUMAN | IKBA_HUMAN  |
| NFKB1_HUMAN | IKBA_HUMAN  |
| NFKB2_HUMAN | IKBA_HUMAN  |
| PTN1_HUMAN  | IKBA_HUMAN  |
| SUMO1_HUMAN | IKBA_HUMAN  |
| TBB4_HUMAN  | IKBA_HUMAN  |
| TERA_HUMAN  | IKBA_HUMAN  |
| UBC_HUMAN   | IKBA_HUMAN  |
| CTNB1_HUMAN | IKKA_HUMAN  |
| IKKB_HUMAN  | IKKA_HUMAN  |
| PRKDC_HUMAN | IKKA_HUMAN  |
| SMAD3_HUMAN | IKKA_HUMAN  |
| TF65_HUMAN  | IKKA_HUMAN  |
| CBP_HUMAN   | IKKB_HUMAN  |
| CTNB1_HUMAN | IKKB_HUMAN  |
| HS90A_HUMAN | IKKB_HUMAN  |
| IKBA_HUMAN  | IKKB_HUMAN  |
| MK01_HUMAN  | IKKB_HUMAN  |
| NEMO_HUMAN  | IKKB_HUMAN  |
| PRKDC_HUMAN | IKKB_HUMAN  |
| TRAF2_HUMAN | IKKB_HUMAN  |
| UBB_HUMAN   | IKKB_HUMAN  |
| HS90A_HUMAN | IKKE_HUMAN  |
| 1433Z_HUMAN | IMB1_HUMAN  |
| EGFR_HUMAN  | IMB1_HUMAN  |
| TNR1B_HUMAN | IMB1_HUMAN  |
| TRADD_HUMAN | IMB1_HUMAN  |
| RAF1_HUMAN  | IRAK1_HUMAN |
| UBC_HUMAN   | IRAK1_HUMAN |
| 1433Z_HUMAN | IRS1_HUMAN  |
| RASA1_HUMAN | IRS1_HUMAN  |
| TNR1A_HUMAN | JAK1_HUMAN  |
| NARG2_HUMAN | JAK2_HUMAN  |
| NEMO_HUMAN  | JAK2_HUMAN  |
| TNR1A_HUMAN | JAK2_HUMAN  |
| 2ABB_HUMAN  | JUN_HUMAN   |
| ANDR_HUMAN  | JUN_HUMAN   |
| BRCA1_HUMAN | JUN_HUMAN   |
| CDN1A_HUMAN | JUN_HUMAN   |
| CSN5_HUMAN  | JUN_HUMAN   |
| ESR1_HUMAN  | JUN_HUMAN   |
| FOS_HUMAN   | JUN_HUMAN   |
| GSK3B_HUMAN | JUN_HUMAN   |
| HSP7C_HUMAN | JUN_HUMAN   |
| MK01_HUMAN  | JUN_HUMAN   |
| MK03_HUMAN  | JUN_HUMAN   |
| MK14_HUMAN  | JUN_HUMAN   |
| NARG2_HUMAN | JUN_HUMAN   |
| PAG1_HUMAN  | JUN_HUMAN   |
| PRKDC_HUMAN | JUN_HUMAN   |
| RS27A_HUMAN | JUN_HUMAN   |
| UBB_HUMAN   | JUN_HUMAN   |

Table S1.Cont.

| Protein 1   | Protein 2   |
|-------------|-------------|
| VAV_HUMAN   | JUN_HUMAN   |
| 1433Z_HUMAN | KAPCA_HUMAN |
| BCL2_HUMAN  | KAPCA_HUMAN |
| ESR1_HUMAN  | KAPCA_HUMAN |
| 1433Z_HUMAN | KPCA_HUMAN  |
| EZRI_HUMAN  | KPCA_HUMAN  |
| PRKDC_HUMAN | KPCD_HUMAN  |
| CASP3_HUMAN | KPCZ_HUMAN  |
| CASP6_HUMAN | KPCZ_HUMAN  |
| CASP7_HUMAN | KPCZ_HUMAN  |
| CASP8_HUMAN | KPCZ_HUMAN  |
| GCR_HUMAN   | LCK_HUMAN   |
| HS90A_HUMAN | LCK_HUMAN   |
| CASP3_HUMAN | LYN_HUMAN   |
| 1433E_HUMAN | M3K1_HUMAN  |
| ARRB1_HUMAN | M3K1_HUMAN  |
| ARRB2_HUMAN | M3K1_HUMAN  |
| HS90A_HUMAN | M3K1_HUMAN  |
| RS27A_HUMAN | M3K1_HUMAN  |
| TRAF2_HUMAN | M3K1_HUMAN  |
| UB2D1_HUMAN | M3K1_HUMAN  |
| UB2D2_HUMAN | M3K1_HUMAN  |
| UBC_HUMAN   | M3K1_HUMAN  |
| UBC9_HUMAN  | M3K1_HUMAN  |
| CASP3_HUMAN | M3K14_HUMAN |
| CASPA_HUMAN | M3K14_HUMAN |
| IKKB_HUMAN  | M3K14_HUMAN |
| NEMO_HUMAN  | M3K14_HUMAN |
| A4_HUMAN    | M3K5_HUMAN  |
| ARRB1_HUMAN | M3K5_HUMAN  |
| ARRB2_HUMAN | M3K5_HUMAN  |
| HSP71_HUMAN | M3K5_HUMAN  |
| TRAF2_HUMAN | M3K5_HUMAN  |
| RS27A_HUMAN | M3K7_HUMAN  |
| UBC_HUMAN   | M3K7_HUMAN  |
| B2CL1_HUMAN | MCL1_HUMAN  |
| BAK_HUMAN   | MCL1_HUMAN  |
| BAX_HUMAN   | MCL1_HUMAN  |
| BCL10_HUMAN | MCL1_HUMAN  |
| BIRC2_HUMAN | MCL1_HUMAN  |
| CASP1_HUMAN | MCL1_HUMAN  |
| CASP2_HUMAN | MCL1_HUMAN  |
| GSK3B_HUMAN | MCL1_HUMAN  |
| MK01_HUMAN  | MCL1_HUMAN  |
| PCNA_HUMAN  | MCL1_HUMAN  |
| RIPK2_HUMAN | MCL1_HUMAN  |
| EP300_HUMAN | MDM2_HUMAN  |
| ESR1_HUMAN  | MDM2_HUMAN  |
| P53_HUMAN   | MDM2_HUMAN  |
| P73_HUMAN   | MDM2_HUMAN  |
| CASP8_HUMAN | MK01_HUMAN  |
| CRKL_HUMAN  | MK01_HUMAN  |
| ESR1_HUMAN  | MK01_HUMAN  |
| FOS_HUMAN   | MK01_HUMAN  |
| G3P_HUMAN   | MK01_HUMAN  |
| PTN1_HUMAN  | MK01_HUMAN  |

Table S1.Cont.

| Protein 1   | Protein 2   |
|-------------|-------------|
| SYUA_HUMAN  | MK01_HUMAN  |
| BCL2_HUMAN  | MK03_HUMAN  |
| CASP8_HUMAN | MK03_HUMAN  |
| CEBPB_HUMAN | MK03_HUMAN  |
| ESR1_HUMAN  | MK03_HUMAN  |
| MK01_HUMAN  | MK03_HUMAN  |
| SYUA_HUMAN  | MK03_HUMAN  |
| CD2A2_HUMAN | MK08_HUMAN  |
| EZRI_HUMAN  | MK08_HUMAN  |
| JUN_HUMAN   | MK08_HUMAN  |
| SMAD3_HUMAN | MK08_HUMAN  |
| TRAF6_HUMAN | MK08_HUMAN  |
| BCL2_HUMAN  | MK14_HUMAN  |
| CFLAR_HUMAN | MP2K1_HUMAN |
| RAF1_HUMAN  | MP2K1_HUMAN |
| TRAF3_HUMAN | MP2K1_HUMAN |
| ABL1_HUMAN  | MUC1_HUMAN  |
| ESR1_HUMAN  | MUC1_HUMAN  |
| GSK3B_HUMAN | MUC1_HUMAN  |
| HDAC1_HUMAN | MUC1_HUMAN  |
| JUN_HUMAN   | MUC1_HUMAN  |
| LCK_HUMAN   | MUC1_HUMAN  |
| RXRA_HUMAN  | MUC1_HUMAN  |
| BRCA1_HUMAN | MYC_HUMAN   |
| CSK21_HUMAN | MYC_HUMAN   |
| MK03_HUMAN  | MYC_HUMAN   |
| MK08_HUMAN  | MYC_HUMAN   |
| NARG2_HUMAN | MYC_HUMAN   |
| RUVB2_HUMAN | MYC_HUMAN   |
| SET_HUMAN   | MYC_HUMAN   |
| TBA3C_HUMAN | MYC_HUMAN   |
| TBA4A_HUMAN | MYC_HUMAN   |
| UBB_HUMAN   | MYC_HUMAN   |
| UBC_HUMAN   | MYC_HUMAN   |
| ABL1_HUMAN  | NARG2_HUMAN |
| EP300_HUMAN | NARG2_HUMAN |
| PRKDC_HUMAN | NARG2_HUMAN |
| PML_HUMAN   | NCOR1_HUMAN |
| ZBT16_HUMAN | NCOR1_HUMAN |
| BCL6_HUMAN  | NCOR2_HUMAN |
| JUN_HUMAN   | NCOR2_HUMAN |
| STA5B_HUMAN | NCOR2_HUMAN |
| ZBT16_HUMAN | NCOR2_HUMAN |
| HS90A_HUMAN | NEMO_HUMAN  |
| HSP74_HUMAN | NEMO_HUMAN  |
| IKBA_HUMAN  | NEMO_HUMAN  |
| IKKA_HUMAN  | NEMO_HUMAN  |
| M3K3_HUMAN  | NEMO_HUMAN  |
| RIP_HUMAN   | NEMO_HUMAN  |
| UBB_HUMAN   | NEMO_HUMAN  |
| UBC_HUMAN   | NEMO_HUMAN  |
| ANDR_HUMAN  | NFKB1_HUMAN |
| HSP74_HUMAN | NFKB1_HUMAN |
| IKKA_HUMAN  | NFKB1_HUMAN |
| NEMO_HUMAN  | NFKB1_HUMAN |
| NFKB2_HUMAN | NFKB1_HUMAN |

Table S1.Cont.

| Protein 1   | Protein 2   |
|-------------|-------------|
| TF65_HUMAN  | NFKB1_HUMAN |
| IKKB_HUMAN  | NFKB2_HUMAN |
| NEMO_HUMAN  | NFKB2_HUMAN |
| TF65_HUMAN  | NFKB2_HUMAN |
| HIF1A_HUMAN | NOTC1_HUMAN |
| AKT1_HUMAN  | NR4A1_HUMAN |
| MK08_HUMAN  | NR4A1_HUMAN |
| CAV1_HUMAN  | NTRK1_HUMAN |
| CDK2_HUMAN  | NTRK1_HUMAN |
| CDK5_HUMAN  | NTRK1_HUMAN |
| CRCM_HUMAN  | NTRK1_HUMAN |
| CRKL_HUMAN  | NTRK1_HUMAN |
| MK01_HUMAN  | NTRK1_HUMAN |
| MK14_HUMAN  | NTRK1_HUMAN |
| SRC_HUMAN   | NTRK1_HUMAN |
| TNR16_HUMAN | NTRK1_HUMAN |
| UBB_HUMAN   | NTRK1_HUMAN |
| BAD_HUMAN   | ORN_HUMAN   |
| P53_HUMAN   | ORN_HUMAN   |
| 1433Z_HUMAN | P53_HUMAN   |
| BRCA1_HUMAN | P53_HUMAN   |
| CD2A2_HUMAN | P53_HUMAN   |
| CDK1_HUMAN  | P53_HUMAN   |
| CSK21_HUMAN | P53_HUMAN   |
| CSN5_HUMAN  | P53_HUMAN   |
| EP300_HUMAN | P53_HUMAN   |
| GRP75_HUMAN | P53_HUMAN   |
| IKKA_HUMAN  | P53_HUMAN   |
| MUC1_HUMAN  | P53_HUMAN   |
| NARG2_HUMAN | P53_HUMAN   |
| NR4A1_HUMAN | P53_HUMAN   |
| PAG1_HUMAN  | P53_HUMAN   |
| SUMO1_HUMAN | P53_HUMAN   |
| UBC_HUMAN   | P53_HUMAN   |
| UBC9_HUMAN  | P53_HUMAN   |
| UBP7_HUMAN  | P53_HUMAN   |
| PAG1_HUMAN  | P73_HUMAN   |
| SUMO1_HUMAN | P73_HUMAN   |
| ESR1_HUMAN  | P85A_HUMAN  |
| ABL1_HUMAN  | PAG1_HUMAN  |
| CTNB1_HUMAN | PAG1_HUMAN  |
| ESR1_HUMAN  | PAG1_HUMAN  |
| SLK_HUMAN   | PAG1_HUMAN  |
| VAV_HUMAN   | PAG1_HUMAN  |
| ACTB_HUMAN  | PAK2_HUMAN  |
| CASP3_HUMAN | PAK2_HUMAN  |
| MYC_HUMAN   | PAK2_HUMAN  |
| RB_HUMAN    | PAK2_HUMAN  |
| CASP3_HUMAN | PARP1_HUMAN |
| CDN1A_HUMAN | PARP1_HUMAN |
| NEMO_HUMAN  | PARP1_HUMAN |
| P53_HUMAN   | PARP1_HUMAN |
| RXRA_HUMAN  | PARP1_HUMAN |
| CASP3_HUMAN | PAXI_HUMAN  |
| PP2AA_HUMAN | PAXI_HUMAN  |
| PTPRC_HUMAN | PAXI_HUMAN  |

Table S1.Cont.

| Protein 1   | Protein 2   |
|-------------|-------------|
| IKKE_HUMAN  | PCNA_HUMAN  |
| TF65_HUMAN  | PCNA_HUMAN  |
| RASA1_HUMAN | PGFRB_HUMAN |
| MYC_HUMAN   | PIN1_HUMAN  |
| PAK2_HUMAN  | PIN1_HUMAN  |
| TF65_HUMAN  | PIN1_HUMAN  |
| VHL_HUMAN   | PIN1_HUMAN  |
| CASP3_HUMAN | PKN1_HUMAN  |
| MK14_HUMAN  | PML_HUMAN   |
| B2CL1_HUMAN | PP1A_HUMAN  |
| TGFR1_HUMAN | PP1A_HUMAN  |
| 2ABB_HUMAN  | PP2AA_HUMAN |
| MK03_HUMAN  | PP2AA_HUMAN |
| MYC_HUMAN   | PP2AA_HUMAN |
| CASP2_HUMAN | PRKDC_HUMAN |
| CASP3_HUMAN | PRKDC_HUMAN |
| CFTR_HUMAN  | PRKDC_HUMAN |
| GRB2_HUMAN  | PRKDC_HUMAN |
| H2AX_HUMAN  | PRKDC_HUMAN |
| M3K3_HUMAN  | PRKDC_HUMAN |
| MYC_HUMAN   | PRKDC_HUMAN |
| NEMO_HUMAN  | PRKDC_HUMAN |
| NFKB1_HUMAN | PRKDC_HUMAN |
| NFKB2_HUMAN | PRKDC_HUMAN |
| SP1_HUMAN   | PRKDC_HUMAN |
| TF65_HUMAN  | PRKDC_HUMAN |
| TNR1A_HUMAN | PRKDC_HUMAN |
| TNR1B_HUMAN | PRKDC_HUMAN |
| TRADD_HUMAN | PRKDC_HUMAN |
| CDK5_HUMAN  | PSN1_HUMAN  |
| KAPCA_HUMAN | PSN1_HUMAN  |
| P85A_HUMAN  | PSN1_HUMAN  |
| CSK21_HUMAN | PSN2_HUMAN  |
| CDK1_HUMAN  | PTN1_HUMAN  |
| TNR1A_HUMAN | PTN11_HUMAN |
| PAG1_HUMAN  | PTN6_HUMAN  |
| SMAD3_HUMAN | PTN6_HUMAN  |
| TNR6_HUMAN  | PTN6_HUMAN  |
| 1433Z_HUMAN | PYR1_HUMAN  |
| 2ABB_HUMAN  | PYR1_HUMAN  |
| NEMO_HUMAN  | PYR1_HUMAN  |
| TNR1A_HUMAN | PYR1_HUMAN  |
| TNR1B_HUMAN | PYR1_HUMAN  |
| TRADD_HUMAN | PYR1_HUMAN  |
| CASP7_HUMAN | RAC1_HUMAN  |
| 1433B_HUMAN | RAF1_HUMAN  |
| 1433Z_HUMAN | RAF1_HUMAN  |
| BCL2_HUMAN  | RAF1_HUMAN  |
| CH60_HUMAN  | RAF1_HUMAN  |
| GCR_HUMAN   | RAF1_HUMAN  |
| ORN_HUMAN   | RAF1_HUMAN  |
| RASH_HUMAN  | RAF1_HUMAN  |
| UB2D2_HUMAN | RAF1_HUMAN  |
| UBC_HUMAN   | RAF1_HUMAN  |
| CASP3_HUMAN | RASA1_HUMAN |
| CASP7_HUMAN | RASA1_HUMAN |

Table S1.Cont.

| Protein 1   | Protein 2   |
|-------------|-------------|
| RASH_HUMAN  | RASA1_HUMAN |
| CRKL_HUMAN  | RASH_HUMAN  |
| MK03_HUMAN  | RASH_HUMAN  |
| MK08_HUMAN  | RASH_HUMAN  |
| RAF1_HUMAN  | RASH_HUMAN  |
| CEBPB_HUMAN | RB_HUMAN    |
| HDAC1_HUMAN | RB_HUMAN    |
| HSP71_HUMAN | RHOA_HUMAN  |
| TNR6_HUMAN  | RHOA_HUMAN  |
| HSPB1_HUMAN | RIF1_HUMAN  |
| TNR6_HUMAN  | RIF1_HUMAN  |
| CASPA_HUMAN | RIP_HUMAN   |
| CFLAR_HUMAN | RIP_HUMAN   |
| EGFR_HUMAN  | RIP_HUMAN   |
| TNR6_HUMAN  | RIP_HUMAN   |
| TR10B_HUMAN | RIP_HUMAN   |
| TRADD_HUMAN | RIP_HUMAN   |
| TRAF1_HUMAN | RIP_HUMAN   |
| TRAF3_HUMAN | RIP_HUMAN   |
| TNR1A_HUMAN | RIPK1_HUMAN |
| TNR6_HUMAN  | RIPK1_HUMAN |
| TRADD_HUMAN | RIPK1_HUMAN |
| NEMO_HUMAN  | RIPK2_HUMAN |
| 1433Z_HUMAN | RS27A_HUMAN |
| 2ABB_HUMAN  | RS27A_HUMAN |
| BIRC2_HUMAN | RS27A_HUMAN |
| CDN1A_HUMAN | RS27A_HUMAN |
| DAXX_HUMAN  | RS27A_HUMAN |
| IKBA_HUMAN  | RS27A_HUMAN |
| IKKE_HUMAN  | RS27A_HUMAN |
| IRAK1_HUMAN | RS27A_HUMAN |
| MYC_HUMAN   | RS27A_HUMAN |
| NEMO_HUMAN  | RS27A_HUMAN |
| P53_HUMAN   | RS27A_HUMAN |
| P73_HUMAN   | RS27A_HUMAN |
| RHOA_HUMAN  | RS27A_HUMAN |
| TERA_HUMAN  | RS27A_HUMAN |
| TGFR1_HUMAN | RS27A_HUMAN |
| TNR1A_HUMAN | RS27A_HUMAN |
| TNR1B_HUMAN | RS27A_HUMAN |
| TRADD_HUMAN | RS27A_HUMAN |
| TRAF1_HUMAN | RS27A_HUMAN |
| XIAP_HUMAN  | RS27A_HUMAN |
| 1433Z_HUMAN | RUVB2_HUMAN |
| IKKE_HUMAN  | RUVB2_HUMAN |
| M3K1_HUMAN  | RUVB2_HUMAN |
| M3K7_HUMAN  | RUVB2_HUMAN |
| TRAF2_HUMAN | RUVB2_HUMAN |
| TRAF6_HUMAN | RUVB2_HUMAN |
| 1433Z_HUMAN | SET_HUMAN   |
| IKKE_HUMAN  | SET_HUMAN   |
| NEMO_HUMAN  | SET_HUMAN   |
| RAC1_HUMAN  | SET_HUMAN   |
| VHL_HUMAN   | SET_HUMAN   |
| EGFR_HUMAN  | SHC1_HUMAN  |
| MYC_HUMAN   | SIN3A_HUMAN |

Table S1.Cont.

| Protein 1   | Protein 2   |
|-------------|-------------|
| NFKB1_HUMAN | SIN3A_HUMAN |
| SUMO1_HUMAN | SIN3A_HUMAN |
| TNFL6_HUMAN | SLK_HUMAN   |
| GSK3B_HUMAN | SMAD1_HUMAN |
| RASA1_HUMAN | SMAD2_HUMAN |
| RHOA_HUMAN  | SMAD2_HUMAN |
| GSK3B_HUMAN | SMAD3_HUMAN |
| MK14_HUMAN  | SMAD3_HUMAN |
| UBC_HUMAN   | SMAD3_HUMAN |
| CEBPB_HUMAN | SMAD4_HUMAN |
| TNR1B_HUMAN | SMUF2_HUMAN |
| ABL1_HUMAN  | SP1_HUMAN   |
| BRCA1_HUMAN | SP1_HUMAN   |
| CASP3_HUMAN | SP1_HUMAN   |
| ESR1_HUMAN  | SP1_HUMAN   |
| SIN3A_HUMAN | SP1_HUMAN   |
| NTRK1_HUMAN | SQSTM_HUMAN |
| RS27A_HUMAN | SQSTM_HUMAN |
| SMAD1_HUMAN | SQSTM_HUMAN |
| TR10A_HUMAN | SQSTM_HUMAN |
| UBB_HUMAN   | SQSTM_HUMAN |
| UBC_HUMAN   | SQSTM_HUMAN |
| MK01_HUMAN  | SRC_HUMAN   |
| NR4A1_HUMAN | SRC_HUMAN   |
| TNR6_HUMAN  | SRC_HUMAN   |
| TRAF1_HUMAN | SRC_HUMAN   |
| TRAF3_HUMAN | SRC_HUMAN   |
| ESR1_HUMAN  | STA5A_HUMAN |
| PGFRB_HUMAN | STA5A_HUMAN |
| FOS_HUMAN   | STAT1_HUMAN |
| NARG2_HUMAN | STAT1_HUMAN |
| PAG1_HUMAN  | STAT1_HUMAN |
| RAC1_HUMAN  | STAT1_HUMAN |
| SMAD4_HUMAN | STAT1_HUMAN |
| TRADD_HUMAN | STAT1_HUMAN |
| ESR1_HUMAN  | STAT3_HUMAN |
| NEMO_HUMAN  | SUMO1_HUMAN |
| ZBT16_HUMAN | SUMO1_HUMAN |
| 1433E_HUMAN | SYUA_HUMAN  |
| CSK21_HUMAN | SYUA_HUMAN  |
| FYN_HUMAN   | SYUA_HUMAN  |
| KSYK_HUMAN  | SYUA_HUMAN  |
| SLK_HUMAN   | SYUA_HUMAN  |
| UBC_HUMAN   | SYUA_HUMAN  |
| VIME_HUMAN  | SYUA_HUMAN  |
| 1433Z_HUMAN | TAU_HUMAN   |
| CASP1_HUMAN | TAU_HUMAN   |
| CASP3_HUMAN | TAU_HUMAN   |
| CASP6_HUMAN | TAU_HUMAN   |
| CASP7_HUMAN | TAU_HUMAN   |
| CASP8_HUMAN | TAU_HUMAN   |
| IKBA_HUMAN  | TBA3C_HUMAN |
| IKKB_HUMAN  | TBA3C_HUMAN |
| IKKE_HUMAN  | TBA3C_HUMAN |
| M3K1_HUMAN  | TBA3C_HUMAN |
| M3K7_HUMAN  | TBA3C_HUMAN |

Table S1.Cont.

| Protein 1   | Protein 2   |
|-------------|-------------|
| NEMO_HUMAN  | TBA3C_HUMAN |
| NFKB1_HUMAN | TBA3C_HUMAN |
| RIPK1_HUMAN | TBA3C_HUMAN |
| RIPK2_HUMAN | TBA3C_HUMAN |
| SLK_HUMAN   | TBA3C_HUMAN |
| TF65_HUMAN  | TBA3C_HUMAN |
| TNR1A_HUMAN | TBA3C_HUMAN |
| TNR1B_HUMAN | TBA3C_HUMAN |
| TRADD_HUMAN | TBA3C_HUMAN |
| BRCA1_HUMAN | TBA4A_HUMAN |
| EGFR_HUMAN  | TBA4A_HUMAN |
| RAC1_HUMAN  | TBA4A_HUMAN |
| IKKB_HUMAN  | TBB4_HUMAN  |
| IKKE_HUMAN  | TBB4_HUMAN  |
| M3K1_HUMAN  | TBB4_HUMAN  |
| M3K7_HUMAN  | TBB4_HUMAN  |
| NEMO_HUMAN  | TBB4_HUMAN  |
| NFKB1_HUMAN | TBB4_HUMAN  |
| NR4A1_HUMAN | TBB4_HUMAN  |
| RIPK1_HUMAN | TBB4_HUMAN  |
| RIPK2_HUMAN | TBB4_HUMAN  |
| TF65_HUMAN  | TBB4_HUMAN  |
| TNR1A_HUMAN | TBB4_HUMAN  |
| TNR1B_HUMAN | TBB4_HUMAN  |
| TRADD_HUMAN | TBB4_HUMAN  |
| 1433B_HUMAN | TBB5_HUMAN  |
| 1433G_HUMAN | TBB5_HUMAN  |
| 1433Z_HUMAN | TBB5_HUMAN  |
| 2ABB_HUMAN  | TBB5_HUMAN  |
| ARRB1_HUMAN | TBB5_HUMAN  |
| EGFR_HUMAN  | TBB5_HUMAN  |
| GRB2_HUMAN  | TBB5_HUMAN  |
| IKBA_HUMAN  | TBB5_HUMAN  |
| IKKA_HUMAN  | TBB5_HUMAN  |
| IKKB_HUMAN  | TBB5_HUMAN  |
| IKKE_HUMAN  | TBB5_HUMAN  |
| JUN_HUMAN   | TBB5_HUMAN  |
| M3K1_HUMAN  | TBB5_HUMAN  |
| M3K14_HUMAN | TBB5_HUMAN  |
| M3K3_HUMAN  | TBB5_HUMAN  |
| M3K7_HUMAN  | TBB5_HUMAN  |
| NEMO_HUMAN  | TBB5_HUMAN  |
| NFKB1_HUMAN | TBB5_HUMAN  |
| NFKB2_HUMAN | TBB5_HUMAN  |
| RIPK1_HUMAN | TBB5_HUMAN  |
| RIPK2_HUMAN | TBB5_HUMAN  |
| TBA4A_HUMAN | TBB5_HUMAN  |
| TBB4_HUMAN  | TBB5_HUMAN  |
| TF65_HUMAN  | TBB5_HUMAN  |
| TNR1A_HUMAN | TBB5_HUMAN  |
| TNR1B_HUMAN | TBB5_HUMAN  |
| TRADD_HUMAN | TBB5_HUMAN  |
| 1433Z_HUMAN | TERA_HUMAN  |
| 1B42_HUMAN  | TERA_HUMAN  |
| HSP74_HUMAN | TERA_HUMAN  |
| NARG2_HUMAN | TERA_HUMAN  |



Table S1.Cont.

| Protein 1   | Protein 2   |
|-------------|-------------|
| ANDR_HUMAN  | TF65_HUMAN  |
| CSK21_HUMAN | TF65_HUMAN  |
| ESR1_HUMAN  | TF65_HUMAN  |
| HSP74_HUMAN | TF65_HUMAN  |
| IKBA_HUMAN  | TF65_HUMAN  |
| KAPCA_HUMAN | TF65_HUMAN  |
| NARG2_HUMAN | TF65_HUMAN  |
| PAG1_HUMAN  | TF65_HUMAN  |
| UBC_HUMAN   | TF65_HUMAN  |
| 1433Z_HUMAN | TGFR1_HUMAN |
| TGFR2_HUMAN | TGFR1_HUMAN |
| TNR1A_HUMAN | TNFA_HUMAN  |
| CASPA_HUMAN | TNFL6_HUMAN |
| DAXX_HUMAN  | TNFL6_HUMAN |
| EZRI_HUMAN  | TNFL6_HUMAN |
| FYN_HUMAN   | TNFL6_HUMAN |
| NCK1_HUMAN  | TNFL6_HUMAN |
| SUMO1_HUMAN | TNFL6_HUMAN |
| TNR6_HUMAN  | TNFL6_HUMAN |
| CASPA_HUMAN | TNR16_HUMAN |
| NTRK1_HUMAN | TNR16_HUMAN |
| SHC1_HUMAN  | TNR16_HUMAN |
| TNR6_HUMAN  | TNR16_HUMAN |
| CFLAR_HUMAN | TNR1A_HUMAN |
| EZRI_HUMAN  | TNR1A_HUMAN |
| FADD_HUMAN  | TNR1A_HUMAN |
| RIP_HUMAN   | TNR1A_HUMAN |
| RIPK1_HUMAN | TNR1A_HUMAN |
| TNFA_HUMAN  | TNR1A_HUMAN |
| TRADD_HUMAN | TNR1A_HUMAN |
| STAT1_HUMAN | TNR1B_HUMAN |
| TNFA_HUMAN  | TNR1B_HUMAN |
| EWS_HUMAN   | TNR6_HUMAN  |
| FADD_HUMAN  | TNR6_HUMAN  |
| FYN_HUMAN   | TNR6_HUMAN  |
| TNFL6_HUMAN | TNR6_HUMAN  |
| BTK_HUMAN   | TR10A_HUMAN |
| EZRI_HUMAN  | TR10B_HUMAN |
| RIPK1_HUMAN | TRADD_HUMAN |
| TNR1A_HUMAN | TRADD_HUMAN |
| CASP3_HUMAN | TRAF1_HUMAN |
| CASP8_HUMAN | TRAF1_HUMAN |
| M3K14_HUMAN | TRAF1_HUMAN |
| IKKA_HUMAN  | TRAF2_HUMAN |
| IKKE_HUMAN  | TRAF2_HUMAN |
| M3K14_HUMAN | TRAF2_HUMAN |
| NEMO_HUMAN  | TRAF2_HUMAN |
| RIPK2_HUMAN | TRAF2_HUMAN |
| TNR1B_HUMAN | TRAF2_HUMAN |
| TRADD_HUMAN | TRAF2_HUMAN |
| TRAF1_HUMAN | TRAF2_HUMAN |
| CASP3_HUMAN | TRAF3_HUMAN |
| M3K14_HUMAN | TRAF3_HUMAN |
| BMR1B_HUMAN | TRAF6_HUMAN |
| FHL2_HUMAN  | TRAF6_HUMAN |
| CASP8_HUMAN | UB2D1_HUMAN |

Table S1.Cont.

| Protein 1   | Protein 2   |
|-------------|-------------|
| IKBA_HUMAN  | UB2D1_HUMAN |
| CTNB1_HUMAN | UB2D2_HUMAN |
| IKBA_HUMAN  | UB2D2_HUMAN |
| BRCA1_HUMAN | UBB_HUMAN   |
| EGFR_HUMAN  | UBB_HUMAN   |
| P53_HUMAN   | UBB_HUMAN   |
| SYUA_HUMAN  | UBB_HUMAN   |
| TGFR1_HUMAN | UBB_HUMAN   |
| TRAF6_HUMAN | UBB_HUMAN   |
| XIAP_HUMAN  | UBB_HUMAN   |
| 1433Z_HUMAN | UBC_HUMAN   |
| AKT1_HUMAN  | UBC_HUMAN   |
| BAX_HUMAN   | UBC_HUMAN   |
| BCL10_HUMAN | UBC_HUMAN   |
| BCL2_HUMAN  | UBC_HUMAN   |
| BIRC2_HUMAN | UBC_HUMAN   |
| CASP8_HUMAN | UBC_HUMAN   |
| CDN1A_HUMAN | UBC_HUMAN   |
| CTNB1_HUMAN | UBC_HUMAN   |
| DAXX_HUMAN  | UBC_HUMAN   |
| EGFR_HUMAN  | UBC_HUMAN   |
| ERBB2_HUMAN | UBC_HUMAN   |
| ERBB3_HUMAN | UBC_HUMAN   |
| ESR1_HUMAN  | UBC_HUMAN   |
| IKKE_HUMAN  | UBC_HUMAN   |
| JUN_HUMAN   | UBC_HUMAN   |
| M3K5_HUMAN  | UBC_HUMAN   |
| MCL1_HUMAN  | UBC_HUMAN   |
| MK01_HUMAN  | UBC_HUMAN   |
| NOTC1_HUMAN | UBC_HUMAN   |
| P73_HUMAN   | UBC_HUMAN   |
| PML_HUMAN   | UBC_HUMAN   |
| PSN2_HUMAN  | UBC_HUMAN   |
| RHOA_HUMAN  | UBC_HUMAN   |
| TERA_HUMAN  | UBC_HUMAN   |
| TNFL6_HUMAN | UBC_HUMAN   |
| TNR1A_HUMAN | UBC_HUMAN   |
| TNR1B_HUMAN | UBC_HUMAN   |
| TRADD_HUMAN | UBC_HUMAN   |
| TRAF1_HUMAN | UBC_HUMAN   |
| TRAF2_HUMAN | UBC_HUMAN   |
| TRAF3_HUMAN | UBC_HUMAN   |
| TRAF6_HUMAN | UBC_HUMAN   |
| XIAP_HUMAN  | UBC_HUMAN   |
| ZBT16_HUMAN | UBC_HUMAN   |
| ESR1_HUMAN  | UBC9_HUMAN  |
| IKKE_HUMAN  | UBC9_HUMAN  |
| JUN_HUMAN   | UBC9_HUMAN  |
| TNR6_HUMAN  | UBC9_HUMAN  |
| P53_HUMAN   | UBP7_HUMAN  |
| SMAD3_HUMAN | UBP7_HUMAN  |
| CBL_HUMAN   | VAV_HUMAN   |
| HDAC2_HUMAN | VHL_HUMAN   |
| NR4A1_HUMAN | VHL_HUMAN   |
| SP1_HUMAN   | VHL_HUMAN   |
| 1433Z_HUMAN | VIME_HUMAN  |

Table S1.Cont.

| Protein 1   | Protein 2   |
|-------------|-------------|
| 2ABB_HUMAN  | VIME_HUMAN  |
| CDK1_HUMAN  | VIME_HUMAN  |
| M3K1_HUMAN  | VIME_HUMAN  |
| NFKB1_HUMAN | VIME_HUMAN  |
| RIPK2_HUMAN | VIME_HUMAN  |
| TNR1B_HUMAN | VIME_HUMAN  |
| TRADD_HUMAN | VIME_HUMAN  |
| AKT1_HUMAN  | XIAP_HUMAN  |
| M3K7_HUMAN  | XIAP_HUMAN  |
| NOTC1_HUMAN | XIAP_HUMAN  |
| 1433Z_HUMAN | XPO1_HUMAN  |
| ABL1_HUMAN  | XPO1_HUMAN  |
| HDAC3_HUMAN | XPO1_HUMAN  |
| TNR1B_HUMAN | XPO1_HUMAN  |
| 1433Z_HUMAN | XRCC6_HUMAN |
| MK08_HUMAN  | XRCC6_HUMAN |
| MYC_HUMAN   | XRCC6_HUMAN |
| PRKDC_HUMAN | XRCC6_HUMAN |
| TERA_HUMAN  | XRCC6_HUMAN |
| VAV_HUMAN   | XRCC6_HUMAN |
| EF1A1_HUMAN | ZBT16_HUMAN |
| M3K3_HUMAN  | ZBT16_HUMAN |

Table S2. Known apoptotic gene involved in plant lectin-induced cancer cell death.

| Gene Name                                   | Protein Name                                                    |
|---------------------------------------------|-----------------------------------------------------------------|
| CASP8/MCH5                                  | Caspase-8                                                       |
| CASP6/MCH2                                  | Caspase-6                                                       |
| CASP7/MCH3                                  | Caspase-7                                                       |
| CASP3/PPP32                                 | Caspase-3                                                       |
| CASP10/MCH4                                 | Caspase-10                                                      |
| CASP9/MCH6                                  | Caspase-9                                                       |
| TP53/P53                                    | Cellular tumor antigen p53                                      |
| TP73/P73                                    | Tumor protein p73                                               |
| BAD/BBC6/BCL2L8                             | Bcl2 antagonist of cell death                                   |
| BAX/BCL2L4                                  | Apoptosis regulator BAX                                         |
| CDKN1A/CAP20/CDKN1/CIP1/MDA6/PIC1/SDI1/WAF1 | Cyclin-dependent kinase inhibitor 1                             |
| BCL2                                        | Apoptosis regulator Bcl-2                                       |
| BID                                         | BH3-interacting domain death agonist                            |
| XIAP/API3/BIRC4/IAP3                        | E3 ubiquitin-protein ligase XIAP                                |
| TNFRSF1A/TNFR/TNFR1                         | Tumor necrosis factor receptor superfamily member 1A            |
| MAP2K1/MEK1/PRKMK1                          | Dual specificity mitogen-activated protein kinase kinase 1      |
| RAF1/RAF                                    | RAF proto-oncogene serine/threonine-protein kinase              |
| YWHAZ                                       | 14-3-3 protein zeta/delta                                       |
| CHUK/IKKA/TCF16                             | Inhibitor of nuclear factor $\kappa$ -B kinase subunit $\alpha$ |
| BCL2L1/BCL2L/BCLX                           | Bcl-2-like protein 1                                            |
| MAPK14/CSBP/CSBP1/CSBP2/CSBP1/MXI2/SAPK2A   | Mitogen-activated protein kinase 14                             |
| RELA/NFKB3                                  | Transcription factor p65                                        |
| AKT1/PKB/RAC                                | RAC- $\alpha$ serine/threonine-protein kinase                   |
| RIPK1/RIP/RIP1                              | Receptor-interacting serine/threonine-protein kinase 1          |
| RASA1/RASA                                  | Ras GTPase-activating protein 1                                 |
| PIK3R1/GRB1                                 | Phosphatidylinositol 3-kinase regulatory subunit $\alpha$       |
| MAPK1/ERK2/PRKM1/PRKM2                      | Mitogen-activated protein kinase 1                              |
| CAD                                         | CAD protein                                                     |
| PARP1/ADPRT/PPOL                            | Poly(ADP-ribose)polymerase 1                                    |

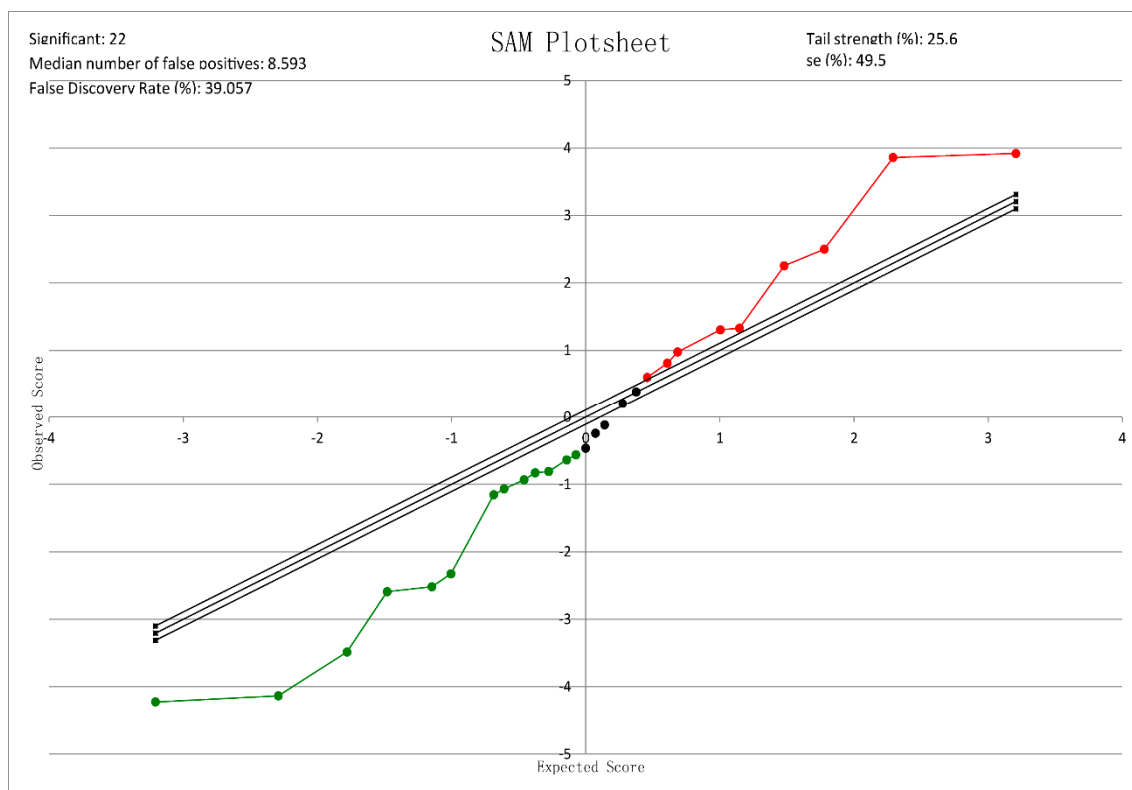

**Figure S1.** Evaluation of microarray data from mesothelioma. Green curve indicates negative significance down-regulated genes; red curve indicates positive significance up-regulated genes.
